# Supplementary material
Source: publisher site journal article supplement (https://www.spandidos-publications.com/5415/downloadSupplementary)
Supplement: Supplementary file 1 [file downloadSupplementary]

Table SI. Clinicopathological characteristics of patients with oral cancer (n=30). There were 20 males and 10 females in the cohort and the number of patients in stage I, II and III were 10 (33.3%), 17 (56.7%) and 3 (10.0%), respectively. The number of patients with different complications, including difficulty swallowing (dysphagia), speech problems, and easy bleeding in the mouth were 8 (26.7%), 10 (33.3%) and 15 (50.0%), respectively.

| Variable                          | n  | %    | P-value |
|-----------------------------------|----|------|---------|
| Sex                               |    |      | n.s.    |
| Male                              | 20 | 66.7 |         |
| Female                            | 10 | 33.3 |         |
| Oral cancer stage                 |    |      | n.s.    |
| I                                 | 10 | 33.3 |         |
| II                                | 17 | 56.7 |         |
| III                               | 3  | 10.0 |         |
| Complications                     |    |      | n.s.    |
| Difficulty swallowing (Dysphagia) | 8  | 26.7 |         |
| Speech problems                   | 10 | 33.3 |         |
| Free bleeding in the mouth        | 15 | 50.0 |         |

---

n.s., not significant.
